# Supplementary material
Source: HighWire-hosted journal article supplement (doi:10.1136/ebmental-2013-101394)
Supplement: ebmental-2013-101394supp.pdf [file ebmental-2013-101394supp.pdf]

|                                                                                                     | <b>Intervention vs. Control schools<br/>OR (95% CI)</b> | <b>LR<sub>INT</sub> vs. LR<sub>CON</sub><br/>OR (95 % CI)</b> | <b>HR<sub>INT</sub> vs. HR<sub>CON</sub><br/>OR (95 % CI)</b> |
|-----------------------------------------------------------------------------------------------------|---------------------------------------------------------|---------------------------------------------------------------|---------------------------------------------------------------|
| <b>Drinking</b><br>throughout trial                                                                 | OR 0.71 (0.51 to 0.99)                                  | NR                                                            | NR                                                            |
| <b>Binge drinking</b><br>throughout trial                                                           | NR                                                      | Reported non-significant                                      | OR 0.57 (0.41 to 0.80)                                        |
| <b>Binge drinking</b><br>at 24 months                                                               | NR                                                      | OR 0.65 (0.42 to 1.0)                                         | NR                                                            |
| <b>Drinking problems</b><br>throughout trial                                                        | NR                                                      | OR 0.96 (0.68 to 1.35)                                        | OR 0.71 (0.53 to 0.94)                                        |
| <b>Drinking problems</b><br>at 24 months                                                            | NR                                                      | OR 0.76 (0.53 to 1.1)                                         | OR 0.58 (0.39 to 0.86)                                        |
| HR – high risk; LR – low risk; INT – intervention schools; CON – control schools; NR - not reported |                                                         |                                                               |                                                               |
